# Supplementary material for: Cas9 function and host genome sampling in Type II-A CRISPR–Cas adaptation
Source: PubMed Central journal article supplement — Genes Dev. 2015 Feb 15;29(4):356–61. doi: 10.1101/gad.257550.114 (PMC4335292; doi:10.1101/gad.257550.114), 2015-02-15
Supplement: supp_29.4.356_Supp_Material.pdf [file supp_29.4.356_Supp_Material.pdf]

**Supplemental Material.** *Streptococcus thermophilus* DGCC7710 CRISPR1 module. Regions deleted in *cas9* and *cas1/cas2/csn2* deletion strains are highlighted grey and yellow, respectively.

ctacttaaaggctctatgaatctcttaaaccctacctattggattaaaaaatatgagagaatttc  
cagttcttactcgctttttcccttgattacagtacaatagacgtcaaaagtgaaaaattgaaat  
gaggtatccctatgtggaaatggtttaagcgactccttatcctcgtcattgtgctcttttggca  
gtgggtggctctacttattccggacaatatcgatagtcaagaccaattaaaatgtatcaacaca  
aacatctcttgttgatttagcccaggctgggtatcgggtggggcatccctctcatcaggtggcctt  
caaccgagattaatcttgatagtaatcagtttcgtcaagtcctaaaagcaagtatagctgaatct  
aatgatgagaccttgcaaaacagtaccgtagagttgaatgattcctatctaacagctaaggttcc  
cgtatctcttggccctatcgaatcaacatttagccttgattttacggtcagcactaacaaggaag  
tcatcctactagatttggtaggtgccacttgggtcgtcttcagttccaaaatcactggttctg  
ccttatctcaagaagagcattgccagctctagtagtgggtggttcgcatggttaacaaccagatcca  
gatcaagcttctgaaataggatacgagattgaccaagccacagttaccaacggtaagatgaagg  
tgaagcttaatatccgatttcccttgccaacaagttagtagtttaaaatcatttgttcaaaaata  
aaatccaaaaccaagctctaaactgacttgggtttttacatgagcaaaagtcgtagagggaggact  
acttatatttttctaggtttcggaatgaagtgaataacggttggtttagataaaaaatgatattaa  
ttgattttttaaaacatagattatagcgtttacaaaaaagttgcaattttcagatactagttta  
taataatagaaaaagcataaggggattattaa (Cas9start) atgagtgacttagtttagga  
cttgatatcgggtataggttctggttgggtgtaggtatccttaacaaagtgacaggagaaattatcca  
taaaaactcacgcatcttcccagcagctcaagcggaaaataacctagtacgtagaacgaatcgtc  
aaggaagacgcttgacacgacgtaaaaaacatcgtagagttcgtttaaatcgtctatttgaggaa  
agtggttaatacaccgattttacgaagatttcaattaatcttaacccatatcaattacgagttaa  
gggcttgaccgatgaattgtctaatgaagaactggttatcgccttaaaaaataggtgaaacacc  
gtgggattagttacctcgatgatgctagtgatgacggaaattcatcaataggagactatgcacaa  
attggttaaggaaaatagtaaaacaattagaaactaagacaccgggacagatacagttggaacgcta  
ccaaacatatggtcaattacgtggtgattttactggtgagaaagatggcaaaaaacatcgcttga  
ttaatgtctttccaacatcagcttatcgttcagaagccttaaggatactgcaaactcaacaagaa  
tttaatccacagattacagatgaatttattaatcgttatctcgaaattttaactggaaaacggaa  
atattatcatggaccggaaatgaaaagtacggactgattatgggtcgttacagaacgagtgagg  
aaactttagacaatattttggaaattctaattgggaaatgtacattttatccagacgagtttaga  
gcagcaaaaagcttcttacacggctcaagaattcaatttgctaaatgatttgaacaatctaacagt  
tctactgaaacaaaaagttgagcaaaagaacagaagaatcaaatcattaattatgtcaaaaatg  
aaaaggcaatggggccagcgaactttttaatatatcgctaagttactttcttgtgatggtgca  
gatatcaagggataccgatatcgacaaatcaggtaaggctgagattcatactttcgaagcctatcg  
aaaaatgaaaacgcttgaaaccttagatattgagcaaatggatagagaaacgcttgataaattag  
cctatgtcttaacattaacactgagaggggaaggtattcaagaagccttagaacatgaatttgct  
gatggttagctttagccagaagcaagttgacgaattggttcaattccgcaaagcaaatagttccat  
ttttggaaaaggatggcataatttttctgtcaaaactgatgatggagtttaattccagaattgtatg  
agacgtcagaagagcaaatgactatcctaacacgacttggaaaacaaaaaacgacttcgtcttca  
aataaaaacaaaatatatagatgaaaaactattaactgaagaaatctataatcctgttggttgctaa  
gtctgttcgccaggctataaaaaatcgtaaatgcccggcattaaagaatacgggagctttgacaata  
ttgtcatcgaaatggctcgtgaaacaaatgaagatgatgaaaagaaagctattcaaaagattcaa  
aaagccaacaaagatgaaaaagatgcagcaatgcttaaggctgctaaccaatataatggaaaggc

tgaattaccacatagtggtttccacggtcataagcaattagcgactaaaatccgcctttggcatc  
agcaaggagaacggttgccctttatactggtaagacaatctcaatccatgatttgataaataattct  
aatcagtttgaagtagatcatattttacctctttctatcacattcgatgatagccttgcaaataa  
ggttttggtttatgcaactgctaaccaagaaaaaggacaacgaacaccttatcaggctttagata  
gtatggatgatgctggtctttccgtgaattaaaagctttgtacgtgagtcaaaaacactttcg  
aacaagaaaaaagaatacctccttacagaagaagatatttcaaagtttgatggttcgaaagaaatt  
tattgaacgaaatctttagatatacaagatacgttcaagagttgtcctcaatgcccttcaagaac  
acttttagagctcacaagattgatacaaaagtttccgtgggttcgtggccaatttacatctcaatg  
agacgccattggggaattgagaagactcgtgatacttatcatcaccatgctgctgatgattgat  
tattgccgcctcaagtcagttgaatttgtggaaaaaacaagaataacccttgaagttattcag  
aagaccaactccttgatattgaaacaggtgaacttattagtgatgatgagtaacaaggaatctgtg  
ttcaaagcccttatcaacattttgttgatacattgaagagtaaagaattgaagacagtatctt  
attctcttatcaagtgatttcaagtttaatcgtaaaatatcagatgccactatttatgcgacaa  
gacaggctaaagtaggaaaagataaggcggatgaaacttatgtcttagggaaaatcaaagatatt  
tatactcaggatggttatgatgctttatgaagatttataagaaggataagtcaaaattcctcat  
gtatcgtcacgaccacaaacctttgagaaagttatcgagccaattttagagaactatcctaata  
agcaataaatgaaaaagggaaagaggtaccatgtaatcctttcctaaaatataaagaagaacat  
ggctataattcgtaaatatagtaaaaaaggcaatggcctgaaatcaagagctttaaatactatga  
tagtaagctaggcaatcatattgatattactccgaaggatagtaacaataaagttgtcttacagt  
cagtttctccatggagagcggatgtctatttcaataagactactggaaaatacgaatcctcgga  
ttgaaatatgctgatttacaatttgaaaaagggacaggaacatataagatttcccaggaaaaata  
caatgacattaagaaaaagaggggtgtagattctgattcagaattcaagtttacactttataaaa  
atgatttgttactcgttaaagatacagaacaaaaagaacaacagctttccgttttcttctcga  
actatgcctaaacaaaagcattatggtgaattaaaaccttatgataaacagaaatttgaaggagg  
tgaggcgtaattaaagtggtgggtaacgttgctaatagtggtcaatgcaaaaaagggctaggaa  
aatcaaatatttctatttataagtaagaacagatgtcctaggaaatcagcatatcatcaaaaat  
gagggtgataagcctaagctagatttttaa (Cas9stop) tattaattgttagaaagtgttgcaa  
ttatagttatcatatactataataatagtgtgaaggggccttacacagttacttfaatcttgca  
gaagctacaaagataaggcttcatgccgaaatcaacacctgtcattttatggcaggggtgtttc  
gttattttaaaggagagaagaa (Cas1start) atgacttggagagttgtacatgtcagtcaaagc  
gagaagatgctgcttaaagcttgataacttatttagtgcaaaagatgggacaagagtttacggtgcc  
actaagtgatatttcgataatcgttgacagaaggtggggatacagttgttacccttcgtctattaa  
gtgccttaagtaaatataatattgcttttagttggttgcgataacgaacatttaccaacaggaatt  
tatcaactcacaaaatgggcacttttagagcgtacaagcgttgaaagaacagctggattgggtctca  
gaaacaaaaggacaaggcatggcagattgtaacttattataaaaatcaataaccaagaggatgttc  
tagccatggttgaaaaagctctggacaacattagattactttcagactataaagagcagatagaa  
cctggtgatagaacgaatagagaaggacatgctgccaaaggtctactttaatgagctctttggtaa  
acaatttgtcagagtaactcagaaagaagctgatgtcatcaatgctggtttaaactatggctatg  
ctatcatgagggctcagatggctagaatagtgggcgggttatggtttaaagggcctattaggaatc  
ttccataaaaatgaatacaatcagtttaatttgggtgacgatttgatggagccatttagacagat  
tgtagatggttgggtatatgataatctacagatcaggaattccttaagtatgagtatagggtgg  
gattgacagatttactcaatgctaaaatcaaatatggcaagagacttgctcagtgacagttgct  
atggacaaaatgtcaaaggctttatcaaatatatttcggaaaaagatagtagtaaatttcactg  
cccagtggtatcaagtttagagtgagaaaaataa (Cas1stop) g (Cas2start) atgaggtat  
gaagcattgagattattatggttttttgatttaccaatggaatccaaggatgaaaaaagaatata

tcgtaat ttcgtaagaattaat ttc aaatggggttgaaatgttacaat ttc cgggtctactatc  
gcacttgtcctaataagaagctttgcaaataaat tttataagaagttaaagatgagcaatcttct  
gctgggaatgtgagact tttggcagttactgaaaaacaat tttcagagatgacattaattatagg  
tggtaaaactaagcaagaagaaatcgtcagtgataataagttgggtggat (Cas7start) atg  
a (Cas2stop) aat tttttgtacaacatccttacaagaacgtattgaattaaatattgggtgcaa  
tcacacaaatgttggtcagaataatgaactcaaatattataacttggcagat tttgaactggat  
tttgggtggaaaaaataactcaagtgaggacttaagtat ttttgattatgaggagcctaccatact  
tgatgaagttggagaaatagtgaaacgaaatagctatcactatatcgacatttcaagtttaagg  
at ttaactggagcagatggaatacaagaaggaacacttggccacgcttaccttcgtaaaatggc  
aatcaagttgatatagtaaccat tttggagaaaat taatgaacaagtagagcttatagaaagagc  
aatgaatcagcatataaaacttaaaactgtggacaggtagaataccatttggagaatctccctctaa  
cactagaccaactactcaca aaaaat ttttagccat tttttgccattgagaacaagaatctatct  
tttgaatgggtttctaataattgataaaactatccctct ttttagaaatgttagaccatcttcttc  
acaacaacagagaagtatctcattgtgctaaaaaataattgatggatttatctcagaagaatctt  
atactat tttttataggcaaatctgtcatctggtaagaagtatccaaatctaacc tttat tttg  
tttcttagtgaccaaggctat tttaaaaatgatgaagaaaatagtaggttcgtcaatattttatc  
tgaccaggtggagcatttgtatgatgttgagttatgtatgaaagggtaatgaaatattatccaa  
gtaatgat tttccgacgagagaaggt ttttaggatgtctttagaaactgtgacacctattttatg  
acaaaaatgctgagacaacctagctctcacttgttgattcagtaataattgaatatcctaaatca  
gctgtttcatttttagttaccgtataagatattctcagacacctgataaggaactattacataaat  
ttttagaaagtaaggattga (Csn2stop) caaggacagttattgattttataatcactatgtgg  
gtataaaaacgtcaaaat ttcatttgag (CRISPR1) gtttttgtaactctcaagatttaagtaac  
tgtacaac tgtttgacagcaaatcaagattcgaattgt gtttttgtaactctcaagatttaagtaa  
ctgtacaac aatgacgaggagctattggcacaacttaca gtttttgtaactctcaagatttaagta  
actgtacaac cgatttgacaatctgctgaccactgttatc gtttttgtaactctcaagatttaagt  
aactgtacaac acacttggcaggcttattactcaacagcga gtttttgtaactctcaagatttaag  
taactgtacaac ctgttccttgttcttttggttgatcttttc gtttttgtaactctcaagatttaa  
gtaactgtacaac ttcattcttccgt ttttggttgcaatcct gtttttgtaactctcaagattta  
agtaactgtacaac gctggcgaggaaacgaacaaggcctcaaca gtttttgtaactctcaagattt  
aagtaactgtacaac catagagtggaaaactagaaacagattcaa gtttttgtaactctcaagatt  
taagtaactgtacaac ataatgccgttgaattacacggcaaggtca gtttttgtaactctcaagat  
ttaagtaactgtacaac gagcgagctcgaataatcttaattacaag gtttttgtaactctcaaga  
tttaagtaactgtacaac gttcgttagcgtcatgtggtaacgtattta gtttttgtaactctcaag  
at ttaagtaactgtacaac ggcgtcccaatcttgattaataacttactcg gtttttgtaactctcaa  
gatttaagtaactgtacaac aacacagcaagacaagaggatgatgctatg gtttttgtaactctca  
agatttaagtaactgtacaac cgacacaagaacgtatgcaagagttcaag gtttttgtaactctca  
agatttaagtaactgtacaac acaattcttcatccgtaactgctcaagtg gtttttgtaactctc  
aagatttaagtaactgtacaac aattaagggcatagaaagggagacaacatg gtttttgtaactct  
caagatttaagtaactgtacaac cgatatttaaaatcattttcataacttcat gtttttgtaactc  
tcaagatttaagtaactgtacaac gcagtatcagcaagcaagctgttagttact gtttttgtaact  
ctcaagatttaagtaactgtacaac ataaactatgaaat tttataat ttttaagagtttttgta  
tctcaagatttaagtaactgtacaac aataat tttatggatagcttaatatcattggtttttgta  
ctctcaagatttaagtaactgtacaac tgcatacgagcacgttcgagttaccgtttc gtttttgta  
actctcaagatttaagtaactgtacaac tctatatcgaggtcaactaacaattatgct gtttttg  
tactctcaagatttaagtaactgtacaac aatcgttcaaatctg ttttaggtacattt gttttt

gtactctcaagatttaagtaactgtacaacaaatcaatacgcacaagagttaaaatgggtccttgtttt  
tgtactctcaagatttaagtaactgtacaacgcttagctgtccaatccacgaacgtggatggttt  
ttgtactctcaagatttaagtaactgtacaaccaaccaacggtaacagctactttttacagtgtt  
tttgtactctcaagatttaagtaactgtacaacataactgaaggataggagcttgtaaagtctgt  
ttttgtactctcaagatttaagtaactgtacaacaaatgctacatctcaaaggatgatcccagag  
ttttgtactctcaagatttaagtaactgtacaacaagtagttgatgacctctacaatgggttat  
gtttttgtactctcaagatttaagtaactgtacaacacctagaagcatttgagcgtatattgatt  
ggttttgtactctcaagatttaagtaactgtacaacaattttgccccttctttgccccttgact  
aggttttgtactctcaagatttaagtaactgtacaacaccattagcaatcatttgtgccattg  
agtgtttgtactctcaagatttaagtaactgtacagtttgattcaacataaaaagccagttca  
attgaacttggctttttaaaatacacgataaacataaggattgtcaggctgactaacctctttaa  
tctcagtcaaattaaggataggaggctctgtttaaggttttgataataattcacagtgatggta  
ccagtgactgttaccagggtattatccttaaagggttggtcgcttcctgtcgttgccagtcgta  
aacacctgaatcggcgatacagtgataataccgaaacggaagatgaactgatatcccatggct  
gtggatcattgtaaacaagccggataggtgaccttcttgcccacgaaatcgtttgatagaga  
tagatgagctccatgacttccatgtaattttccgtggtaatctggatggctcacgtcccttgta  
cttggctagctccttggctcatttcttctcataagctgaggaggtgaagtaggagctgggtccg  
gccttaagtactgggtagtcgttccctcttgattggcctgattaggatcgctccctgcccagct  
ggaaaatgataaccttttagctgatacagatattggcatccaggggtcaccgttggcactaagagccc  
agtgagaactggaaatgccaagagaacgatgctggctccttggccactcgacctgacaaatgcg  
agtgaacctttatcttcatccaaacgatgagttgaaccaaagcgaggatgaaggaaagcgcc  
atggaaatgtaagccaggtaggagtagtgatattaatgtactggttgagcttgccagaaacttg  
caagtacatgacgagctcaaaataccagataagatgagaaaacgtaacattaaatacccccaat  
actagacagtaaatgactgttaccagacttgtgggtcccacaaagagcccgacaaagcgtgtctt  
aaactgggtgttcatcatgatcaagttcttgatatcaacataggaccgatgata
