# Supplementary material for: Cas9 function and host genome sampling in Type II-A CRISPR–Cas adaptation
Source: PubMed Central journal article supplement — Genes Dev. 2015 Feb 15;29(4):356–61. doi: 10.1101/gad.257550.114 (PMC4335292; doi:10.1101/gad.257550.114), 2015-02-15
Supplement: supp_29.4.356_Supp_Table_S1.pdf [file supp_29.4.356_Supp_Table_S1.pdf]

**Supplemental Table S1.** Analysis of spacers acquired in wild type *Sth* expressing increased Cas1/Cas2/Csn2 (Figures 1B, 2D, and 3).

| spacer # | spacer                          | PAM <sup>1</sup>                               | source <sup>2</sup> | strand <sup>3</sup> |
|----------|---------------------------------|------------------------------------------------|---------------------|---------------------|
| 1        | TTTATTGGCTTCACGAATAACCTTACGCCC  | TG <b>AGAAT</b> TCT                            | G                   | plus                |
| 2        | ATAACTAAACGAAATAAACGCTAAAACGTC  | TC <b>AGAAAC</b> G                             | P                   | minus               |
| 3        | GATATTAGCTTTTCGTCATCAACTACAGTT  | <b>ACA</b> AATAAC                              | G                   | minus               |
| 4        | TTTCGAGGAATATGATCCGCTTACAGGTGAG | <b>AGAAT</b> AAAA                              | G                   | minus               |
| 5        | AAGCGCTTGAAAGAACAGCTGGATTGGTCT  | <b>CAGAA</b> CAAA                              | G/P                 | plus                |
| 6        | AGCTGTATTTGAGTTTATCACCCCTTGTCAC | TA <b>AGAAA</b> ATA                            | P                   | minus               |
| 7        | AAGATATTGTTTCAACAAACTCTAGCGCCT  | TT <b>AGATT</b> ATG                            | P                   | plus                |
| 8        | TACCAACAATGATAGCTGGACGGTTAATCC  | AG <b>AGAAT</b> GAA                            | G                   | plus                |
| 9        | GAAACTAGTACAGTTATTACAGCACCAAGTA | <b>CAGAAG</b> TAGT                             | G                   | plus                |
| 10       | AACCCATCTTTTCTAACTTAGCCATGTCAT  | TAC <b>GAAT</b> GGT                            | G                   | minus               |
| 11       | AGAGTTTTATGATTTATACCTTTCTGATGT  | AG <b>AGAAAT</b> TAT                           | P                   | plus                |
| 12       | AAGGACTTAAAAGAGCGTATTGAAAGATAC  | AG <b>AGAAAT</b> TGG                           | P                   | plus                |
| 13       | TAAGAGAAGTGTAATAATCATGAAAAACAA  | AA <b>AGAAAT</b> TAT                           | P                   | minus               |
| 14       | TATAAACCTTTAAGAACTTTCTTTT       | GTTTTGGTCG<br>TTTT <b>TTCT</b> TG <sup>3</sup> | P                   | minus               |
| 15       | AATTGCTTGCAATTTTGCCGAGCGGTAGCG  | CT <b>GGAAA</b> ATT                            | P                   | plus                |
| 16       | TCAAATCTGCGGTTGCGGCGTTAGCTATA   | GA <b>AGAAT</b> ATG                            | P                   | plus                |
| 17       | TCACTGGCCGTCGTTTTACAACGTCGTGAC  | TG <b>GGAAA</b> ACC                            | P                   | minus               |
| 18       | TAAAACATTCTCTGGTATTTGGACTCCTGT  | AA <b>AGAAT</b> GAC                            | P                   | plus                |

|    |                                 |            |   |       |
|----|---------------------------------|------------|---|-------|
| 19 | GGCACTCGGCACTTAATGGGGGGTCGTAGT  | ACGGAAGCAA | P | minus |
| 20 | GCTGTATTTGAGTTTATCACCCCTTGTCACT | AAGAAAATAA | P | minus |
| 21 | TTGAGAGGCTTTATGATGTTCAAAAAGAT   | AGAGAAAAT  | G | plus  |
| 22 | ATAAATCTGTTAAGTCTCATCTCTTACAAG  | GAATCTTAGA | G | minus |
| 23 | TTTAGGAGGCTTACTTGTCTGCTTTCTTCA  | TTAGAATCAA | P | minus |
| 24 | AAATGCGTGGTGAACACTCTAAGGAATTAC  | AAGAATTGCG | G | minus |
| 25 | AACGAGCTATTGAATTAGCTGAAGAATACC  | CAGAAATTTA | G | minus |
| 26 | TTAAACCCAGTAAATGAAGTCCATGGAATA  | ATAGAAAGAG | P | minus |
| 27 | GAGGCTCAACGTCAATAAAGCAATTGGAAT  | AAAGAAGCGA | P | minus |
| 28 | AGTAAATGAAGTCCATGGAATAATAGAAAAG | AGAAAAAGCA | P | minus |
| 29 | AGTTATGCAAAGGTTCTTGATGCTGAAACG  | GGGGAATAA  | P | plus  |
| 30 | TTATATCATGGCTATTA AAAATACTAAAG  | CTAGAAATTT | P | plus  |
| 31 | AATCGCCTTGCAGCACATCCCCCTTTCGCC  | AGGGATAGA  | P | minus |
| 32 | AGGTCTTGTGGCTAATTTAGCATAATTG    | TTTGAAGTAG | G | minus |
| 33 | TTGGCAGATTATGCTGACTTCATGGCTATC  | AAAGAATACT | G | minus |
| 34 | TCCGACTCTGAGAACTTCTGGAATCGCTA   | GAGAATTTCT | P | plus  |
| 35 | TTATATCCTGACTCAATTCCTAATGATTGG  | AAAGAAAAT  | P | plus  |
| 36 | TTACAGGTACATCATTCTGTTTGTGATGGT  | TATCATGCAG | P | plus  |
| 37 | GAATAAAGAAGCGAAAAGGAGAAGTCGGT   | TCAGAAAAG  | P | minus |

<sup>1</sup>PAMs matching the previously identified motif (NNAGAAW, W = A or T) are highlighted in red. PAMs with 1 SNP, or position shift of 1 bp from NNAGAAW are highlighted in. PAMs with 2 SNPs, or 1 SNP and 1 position shift from NNAGAAW are highlighted in.

<sup>2</sup>G, protospacers originating from *Sth* genome; P, protospacers originating from the plasmid.

<sup>3</sup>Plus and minus, protospacer matching the plus or minus strand (arbitrarily assigned) of the source.

<sup>4</sup>Reverse complement of the upstream sequence of spacer #14 matches NNAGAAW
