# Supplementary material for: Cas9 function and host genome sampling in Type II-A CRISPR–Cas adaptation
Source: PubMed Central journal article supplement — Genes Dev. 2015 Feb 15;29(4):356–61. doi: 10.1101/gad.257550.114 (PMC4335292; doi:10.1101/gad.257550.114), 2015-02-15
Supplement: supp_29.4.356_Supp_Table_S2.pdf [file supp_29.4.356_Supp_Table_S2.pdf]

**Supplemental Table S2.** PAM analysis of spacers acquired in wild-type *Sth* expressing increased Cas1/Cas2/Csn2 (Figure 1B and Supplemental Table S1)

| Source <sup>1</sup> \ PAM <sup>2</sup> | NNAGAAW              | 1 SNP    | 2 SNPs  | Reverse | No similarity | Total |
|----------------------------------------|----------------------|----------|---------|---------|---------------|-------|
| Genome                                 | 4 (33%) <sup>3</sup> | 4 (33%)  | 3 (25%) | 0       | 1 (8%)        | 12    |
| Plasmid                                | 12 (48%)             | 9 (36%)  | 2 (8%)  | 1 (4%)  | 1 (4%)        | 25    |
| Total                                  | 16 (43%)             | 13 (35%) | 5 (14%) | 1 (3%)  | 2 (5%)        | 37    |

<sup>1</sup>Genome, protospacers originating from *Sth* genome; Plasmid, protospacers originating from the plasmid.

<sup>2</sup>PAMs are classified as matching the previously identified motif (NNAGAAW, W = A or T), with 1 SNP, or position shift of 1 bp from NNAGAAW (1 SNP), with 2 SNPs, or 1 SNP and 1 position shift (2 SNPs) from NNAGAAW, reverse (reverse complement of the upstream sequence matches NNAGAAW), and no similarity to NNAGAAW.

<sup>3</sup>Percentage of spacers with the designated PAM among all spacers from the same protospacer source is shown in parentheses.
