# Supplementary material for: Cas9 function and host genome sampling in Type II-A CRISPR–Cas adaptation
Source: PubMed Central journal article supplement — Genes Dev. 2015 Feb 15;29(4):356–61. doi: 10.1101/gad.257550.114 (PMC4335292; doi:10.1101/gad.257550.114), 2015-02-15
Supplement: supp_29.4.356_Supp_Table_S3.pdf [file supp_29.4.356_Supp_Table_S3.pdf]

**Supplemental Table S3.** Analysis of spacers acquired in *Sth cas1/cas2/cas2* deletions strain expressing increased Cas1/Cas2/Csn2 (Figures 1B and 3).

| spacer # | spacer                          | PAM <sup>1</sup> | source <sup>2</sup> | strand |
|----------|---------------------------------|------------------|---------------------|--------|
| 1        | TATTTAAGTTAAACCCAGTAAATGAAGTCC  | ATGGAATAAT       | P                   | minus  |
| 2        | TTCTAATGTCACTAACCTGCCCGTTAGTT   | GAAGAAGGTT       | P                   | plus   |
| 3        | TTTCCGACGAGAGAAGGTTTTAGGATGTCT  | TTAGAAACTG       | P                   | plus   |
| 4        | AGACGCCAACTGAGGCAGTAGATCAGCCTT  | CAGAAAAGAT       | G                   | minus  |
| 5        | TCAAAATCTGCGGTTGCGGCGTTAGCTATA  | GAAGAATATG       | P                   | plus   |
| 6        | AATCAGCATATAAACTTAAACTGTGGACAG  | GTAGAATACC       | P                   | plus   |
| 7        | AGAGTTTTATGATTTATACCTTTCTGATGT  | AGAGAAATAT       | P                   | plus   |
| 8        | TTTTGGGCGCTAGAAGTGGCTAAGGAACTT  | CAGAAAGACT       | G                   | plus   |
| 9        | TCTAATGTCACTAACCTGCCCGTTAGTTG   | AAGAAGGTTT       | P                   | plus   |
| 10       | GATGTCCAGATTATTGAGAGGTTTCATCAA  | TAGAATAATA       | G                   | plus   |
| 11       | AGCTTCATCCAAAACAGTATCGGTCACCTG  | TTCAGAAAAG       | G                   | minus  |
| 12       | CAAATTCCTTGCAATGGCCTTTAGAATCATA | TAGAATAGGT       | G                   | minus  |
| 13       | ATAACTAAACGAAATAAACGCTAAAACGTC  | TCAGAAACGA       | P                   | minus  |
| 14       | GCTTAAGAACGCTAGTATCGCCGGCATATC  | GTGGTAATTC       | G                   | minus  |
| 15       | AAATATTGGTGCAATCACACAAATTGTTGG  | TCAGAATAAT       | P                   | plus   |
| 16       | TTTGAATCATGAATCAAAGGACGCTATTGC  | TAAGAATAAA       | P                   | plus   |
| 17       | TTATATCCTGACTCAATTCCTAATGATTGG  | AAAGAAAAT        | P                   | plus   |
| 18       | TTTCTAAAAAGAGGGATAGTTTATCAATA   | TTAGAAACCC       | P                   | minus  |
| 19       | AGCTGTATTTGAGTTTATCACCCCTTGTCAC | TAAGAAAATA       | P                   | minus  |

|    |                                 |            |   |       |
|----|---------------------------------|------------|---|-------|
| 20 | AATATTGGTGCAATCACACAAATTGTTGGT  | CAGAATAATG | P | plus  |
| 21 | TTCCTGCCCAGTGGTATCAAGTTTAGAGT   | GGAGAAAATA | P | plus  |
| 22 | TGCCAATCAAGTTGATATAGTAACCCATTT  | GGAGAAAATT | P | plus  |
| 23 | TGTCTTGAAGTAAAAAATCAGCATGTGTT   | TAGAAATTAT | G | minus |
| 24 | AAGGACTTAAAGAGCGTATTGAAAGATAC   | AGAGAAATGG | P | plus  |
| 25 | TCTGTTAATTTTTTATCTTGCTCTTTTGTC  | AGAGAAATCA | P | minus |
| 26 | TACGAGATCAGGAATTCCTTAAGTATGAGT  | ATAGGTTGGG | P | plus  |
| 27 | AAAAAGATGTTTTTTTGCCCATATCTCTA   | TGAAAAAAC  | P | plus  |
| 28 | TTTTAAGGATTTACTGGAGCAGATGGAATA  | CAAGAAAGGA | P | plus  |
| 29 | AGCCGAAATGAACTGCACCCAAAAGTTAG   | ACAGAAAAAA | G | plus  |
| 30 | TTATATATATTGCACGAAATCCTGTAACA   | ATAGAAAGCG | P | plus  |
| 31 | TTAAACCCAGTAAATGAAGTCCATGGAATA  | TAAGAAAATA | P | minus |
| 32 | AATTTTCGGTCTACTATCGCACTTGTCCTAA | TAGAAGCTTT | P | plus  |

<sup>1</sup>PAMs matching the previously identified motif (NNAGAAW, W = A or T) are highlighted in red. PAMs with 1 SNP, or position shift of 1 bp from NNAGAAW are highlighted in. PAMs with 2 SNPs, or 1 SNP and 1 position shift from NNAGAAW are highlighted in.

<sup>2</sup>G, protospacers originating from *Sth* genome; P, protospacers originating from the plasmid.

<sup>3</sup>Plus and minus, protospacer matching the plus or minus strand (arbitrarily assigned) of the source.

<sup>4</sup>Reverse complement of the upstream sequence of spacer #14 matches NNAGAAW
