# Supplementary material for: Cas9 function and host genome sampling in Type II-A CRISPR–Cas adaptation
Source: PubMed Central journal article supplement — Genes Dev. 2015 Feb 15;29(4):356–61. doi: 10.1101/gad.257550.114 (PMC4335292; doi:10.1101/gad.257550.114), 2015-02-15
Supplement: supp_29.4.356_Supp_Table_S4.pdf [file supp_29.4.356_Supp_Table_S4.pdf]

**Supplemental Table S4.** Analysis of spacers acquired in the *cas9* deletion strain expressing dCas9 and Cas1/Cas2/Csn2 (Figures 2C, and 2D)

| Clone <sup>1</sup> | Spacer# | Spacer                         | PAM <sup>2</sup>                      | Source <sup>3</sup> | Location <sup>4</sup> | Strand <sup>5</sup> |
|--------------------|---------|--------------------------------|---------------------------------------|---------------------|-----------------------|---------------------|
| 1                  | 1       | TCCTTAGGAACCACGATGCTCATTCTACT  | TCAGAAAATG                            | G                   | 833792..833821        | plus                |
|                    | 2       | TGTTTAGTGAAAATTGCATCCGTTACTCGA | CTAGAAATAA                            | G                   | 1492273..1492302      | plus                |
| 2                  | 1       | TCAAGTCTTGCTTGCTAAACGTATGGGTAA | GAAGAAAATC                            | G                   | 196047..196076        | minus               |
|                    | 2       | AGAGAAGATTACCAACGTGCTGAGAAGGCC | CTAGAAAGTG                            | G                   | 1549996..1550025      | plus                |
|                    | 3       | AACACCTAGAAGTGCTACACCCGCGAGGGC | CAACCATTTG                            | G                   | 68965..68994          | plus                |
|                    | 4       | AAGATGTCTTTGAGTTAGGTATTAATACTA | GTGGAATACC                            | G                   | 792095..792124        | plus                |
| 3                  | 1       | GAATTAATAATAAGGTAATAGATTTACATT | AGAAAATGAA                            | P                   |                       |                     |
|                    | 2       | CTTCAAGGAAGTCATCATGTTTTTCAATCG | CAAGAATGAC                            | G                   | 572859..572888        | minus               |
| 4                  | 1       | AAAATCAAGCCAGAACATCAATACCTGATA | CCAGAAAAAA                            | G                   | 788533..788562        | plus                |
| 5                  | 1       | CATATGTAAGTAATTACATATAGATAGTAA | CAAGAAAATA                            | G                   | 1792323..1792352      | plus                |
|                    | 2       | GGCTTCTTCAATTTACGACGCTCCAAGCC  | AAGGCTGGTG<br>TGGTTTCTTT <sup>6</sup> | G                   | 580391..580420        | plus                |
|                    | 3       | AACTTTCTATCATTCAAGCGATTTATCCC  | AAAGAAATGG                            | G                   | 549228..549257        | minus               |
|                    | 4       | AAGAGTCACGGTAGCTGAGACATCTATCGT | TGAGAAAAC                             | G                   | 700732..700761        | minus               |
| 6                  | 1       | same as 3-1                    |                                       |                     |                       |                     |
|                    | 2       | AGCTCTTTCATTGCTAAAGTTACCTGCTTT | GAAGAAAAGA                            | G                   | 571256..571285        | minus               |
| 7                  | 1       | same as 3-1                    |                                       |                     |                       |                     |
|                    | 2       | GAACTCGGCAAAATGGCCCCGTAAC TTCG | GAGAAGGGGC                            | G                   | 1794107..1794136      | plus                |

|    |     |                                 |                                       |   |                  |       |
|----|-----|---------------------------------|---------------------------------------|---|------------------|-------|
| 8  | 1   | same as 3-1                     |                                       |   |                  |       |
|    | 2   | TCCATTTCTTTGGGATAAAATCGCTTGAATG | ATAGAAAAGTT                           | G | 549217..549246   | plus  |
|    | 3   | CGAAAAGTTCTTCTCTATACCAGATTCTT   | ACAGAAAAG                             | G | 1427051..1427080 | plus  |
| 9  | 1   | TACTCTGGTAGACTCTATAACACTCAAACAG | GAGAAAGAAAT                           | G | 488227..488257   | minus |
|    | 2   | ATGAGGTGCTTGATACCCCTTACAGACCGTG | AAGAAAATGT                            | G | 99484..99513     | minus |
|    | 3   | AATTATCATTTACAGGAGAGCTTGTAGATT  | TGATGGAAAT<br>TTTATTCTTC <sup>6</sup> | G | 1682356..1682385 | plus  |
|    | 4   | TACCAGTTTTACCAACAGACAAGACACCAT  | AGAGAAGAGC                            | G | 1728406..1728435 | minus |
|    | 5   | GCAGCAATGCTTAAGGCTGCTAACCAATAT  | AATGGAAAGG                            | G | 517776..517805   | plus  |
|    | 6   | CAAAGACATCAAACGGTTGGGCTTTGGTTT  | TAGAAACTTC                            | G | 1736629..1736658 | minus |
|    | 7   | CAATACAAGAAAAATGGGTATACTCTTCTT  | GAGAAAAGAA                            | G | 1560601..1560630 | plus  |
|    | 8   | TTAACCCATTCTTGCGTAGTGAGTTGCCT   | AAAGAAATTT                            | G | 1438643..1438672 | plus  |
|    | 9   | TTAAGAGATTGTCTTAACCTCATCTCCCCT  | TCAGAAAATT                            | G | 18153..18182     | plus  |
|    | 10  | CCTTCGCTATCTTAGGGACTGCCTTGCCA   | GAAGAAATCT                            | G | 514495..514523   | plus  |
| 10 | 1   | CTTCTTCTTGCAACGCCTGTTCTAGGTCTT  | TAGAAATCT                             | G | 1477793..1477822 | minus |
|    | 2   | AAAAAATTCGGCACAGAACCTCTGGTCACT  | CTAGAAAAAA                            | G | 539518..539547   | minus |
|    | 3   | GCAGTTCGTCGTCGTAGCAATCGAAATG    | GCAGCAAGTC                            | G | 1057015..1057044 | plus  |
|    | 4   | ATTTGGCGTTGAAAATCAACTTAAAAAAGG  | TAGAATGGTC                            | G | 1168937..1168966 | plus  |
| 11 | 1-3 | same as 11-1,2,3                |                                       |   |                  |       |
|    | 4   | GCTGATATTGTGGAAGACTATAATATCCTA  | GAAGAAGCAA                            | G | 324199..324228   | minus |

|    |     |                                 |             |   |                  |       |
|----|-----|---------------------------------|-------------|---|------------------|-------|
| 12 | 1-3 | same as 11-1,2,3                |             |   |                  |       |
|    | 4   | CTGCAAAATAAAATATAAGACCTATCATCC  | TAAGAAAGAA  | G | 323990..324019   | plus  |
| 13 | 1   | CTACTCTATCTTTTCGTAAGATGCGTGACAA | GAAGAAACGC  | G | 918969..918998   | plus  |
|    | 2   | AGCTGTATTTGAGTTTATCACCCCTTGTCAC | TAAGAAAATA  | P |                  |       |
| 14 | 1   | ACCAATGGTATTGCAGACTATATCGGTTCT  | GTAGAAGTTG  | G | 1031064..1031093 | plus  |
|    | 2   | CATTCTGGTCAATCCGTCACCCAGCTGTCT  | AAAGAATACG  | G | 510462..510491   | plus  |
| 15 | 1   | TTCATCTTGTGGACGTGACCAGTTTTTCAGT | TGAGAAAGCA  | G | 958812..958841   | minus |
|    | 2   | AGGACAAGATTGGACGCGACCGCCACGATC  | GTAGAAAACG  | G | 972212..972241   | minus |
|    | 3   | GTAACCATGAATCCACCGATTGTTCCGACT  | TTAGAAACTT  | G | 1086869..1086898 | minus |
|    | 4   | TCGTAACGCCCTTGGTGAGGATGGGACCAT  | GCAGAATTAT  | G | 473222..473251   | plus  |
|    | 5   | CTTATCGCCATAATAGTTGTTGATAACAATC | TTAGAATGTG  | G | 545894..545923   | minus |
| 16 | 1   | TCATTTTTAACTTCTTAGCTTACATTCGTG  | TAAGAAAAAA  | G | 376665..376694   | minus |
|    | 2   | AATCAGGCCGAAAAAGATTTCTTAGCTGGT  | AAGAAAACCTC | G | 1121023..1121052 | plus  |
|    | 3   | GGATTACTTGGTTAACACTTTCAAAGCTA   | AGAGAAAATA  | G | 773492..773521   | plus  |
|    | 4   | TTCCAATTTCAACAGCACCTGATTGCACT   | TGGGAAAGTC  | G | 752117..752146   | minus |
|    | 5   | TGTTTCATGATTATAGTGGTTATCAGCTGG  | TAAGAAAATC  | G | 525465..525494   | minus |
|    | 6   | AAAGCAGTGAGACTGCCTCCACATGTGATG  | CTAGAAAATA  | G | 508229..508258   | minus |

<sup>1</sup>Each clone represents a series of adaptation events in a single CRISPR array. Sixteen CRISPR PCR clones with 1-10 new spacers were analyzed.

<sup>2</sup>PAMs matching the previously identified motif (NNAGAAW, W = A or T) are highlighted in red. PAMs with 1 SNP, or position shift of 1 bp from NNAGAAW are highlighted in blue. PAMs with 2 SNPs, or 1 SNP and 1 position shift from NNAGAAW are highlighted in green.

<sup>3</sup>G, protospacer originating from *Sth* genome; P, protospacer originating from the plasmid.

<sup>4</sup>Protospacers are mapped to an assembly of 17 contigs (in order) of *Sth* DDCC7710 genome sequences.

<sup>5</sup>Plus and minus, protospacer matching the plus or minus strand (arbitrarily assigned) of the genome.

<sup>6</sup>Reverse complement of the upstream sequences of spacers match NNAGAAW motif
