# Supplementary material for: Cas9 function and host genome sampling in Type II-A CRISPR–Cas adaptation
Source: PubMed Central journal article supplement — Genes Dev. 2015 Feb 15;29(4):356–61. doi: 10.1101/gad.257550.114 (PMC4335292; doi:10.1101/gad.257550.114), 2015-02-15
Supplement: supp_29.4.356_Supp_Table_S5.pdf [file supp_29.4.356_Supp_Table_S5.pdf]

**Supplemental Table S5.** PAM analysis of spacers acquired in the *cas9* deletion strain expressing dCas9 and Cas1/Cas2/Csn2 (Figures 2C, and Supplemental Table S4)

| Source <sup>1</sup> \ PAM <sup>2</sup> | NNAGAAW               | 1 SNP    | 2 SNPs | Reverse | No similarity | Total |
|----------------------------------------|-----------------------|----------|--------|---------|---------------|-------|
| Genome                                 | 28 (61%) <sup>3</sup> | 12 (26%) | 4 (9%) | 2 (4%)  | 0             | 46    |
| Plasmid                                | 1 (50%)               | 1 (50%)  | 0      | 0       | 0             | 2     |
| Total                                  | 29 (60%)              | 13 (27%) | 4 (8%) | 2 (4%)  | 0             | 48    |

<sup>1</sup>Genome, protospacer originated from *Sth* genome; Plasmid, protospacer originated from the plasmid.

<sup>2</sup>PAMs are classified as matching the previously identified motif (NNAGAAW, W = A or T), with 1 SNP, or position shift of 1 bp from NNAGAAW (1 SNP), with 2 SNPs, or 1 SNP and 1 position shift (2 SNPs) from NNAGAAW, reverse (reverse complement of the upstream sequence matches NNAGAAW), and no similarity to NNAGAAW.

<sup>3</sup>Percentage of spacers with the designated PAM among all spacers from the same protospacer source is shown in parentheses.
