# Supplementary material for: Cas9 function and host genome sampling in Type II-A CRISPR–Cas adaptation
Source: PubMed Central journal article supplement — Genes Dev. 2015 Feb 15;29(4):356–61. doi: 10.1101/gad.257550.114 (PMC4335292; doi:10.1101/gad.257550.114), 2015-02-15
Supplement: supp_29.4.356_Supp_Table_S6.pdf [file supp_29.4.356_Supp_Table_S6.pdf]

**Supplemental Table S6. *Sth* strains**

| <b><i>Sth</i> Strains</b> | <b>Relevant Characteristics</b>                  | <b>Plasmids</b>        | <b>Figures</b> | <b>Source</b>               |
|---------------------------|--------------------------------------------------|------------------------|----------------|-----------------------------|
| DGCC7710                  | wild-type                                        |                        | 1A, 2A         | provided by Sylvain Moineau |
| WYZ300                    | wild-type                                        | pWAR228 (empty vector) | 1B, 2C         | This study                  |
| WYZ292                    | wild-type                                        | pCas1/Cas2/Csn2        | 1B, 2C, 3      | This study                  |
| WYZ717                    | wild-type                                        | pCas2/Csn2             | 1B             | This study                  |
| WYZ719                    | wild-type                                        | pCas1/Csn2             | 1B             | This study                  |
| WYZ748                    | wild-type                                        | pCas1/Cas2             | 1B             | This study                  |
| WYZ1054                   | $\Delta cas1/cas2/csn2$                          | pWAR228 (empty vector) | 1B             | This study                  |
| WYZ1056                   | $\Delta cas1/cas2/csn2$                          | pCas1/Cas2/Csn2        | 1B, 3          | This study                  |
| WYZ1058                   | $\Delta cas1/cas2/csn2$                          | pCas2/Csn2             | 1B             | This study                  |
| WYZ1060                   | $\Delta cas1/cas2/csn2$                          | pCas1/Csn2             | 1B             | This study                  |
| WYZ1062                   | $\Delta cas1/cas2/csn2$                          | pCas1/Cas2             | 1B             | This study                  |
| WYZ686                    | $\Delta cas9$                                    | pWAR228 (empty vector) | 2A, 2C         | This study                  |
| WYZ688                    | $\Delta cas9$                                    | pCas1/Cas2/Csn2        | 2A, 2C         | This study                  |
| WYZ752                    | $\Delta cas9$                                    | pCas1/Cas2/Csn2/Cas9   | 2A, 2C         | This study                  |
| WYZ884                    | $\Delta cas9$                                    | pCas1/Cas2/Csn2/dCas9  | 2A, 2C         | This study                  |
| WYZ1093                   | $\Delta cas9$ , phage-matching spacer in CRISPR1 | pCas1/Cas2/Csn2        | 2B             | This study                  |
| WYZ1085                   | $\Delta cas9$ , phage-matching spacer in CRISPR1 | pCas1/Cas2/Csn2/Cas9   | 2B             | This study                  |
| WYZ1099                   | $\Delta cas9$ , phage-matching spacer in CRISPR1 | pCas1/Cas2/Csn2/dCas9  | 2B             | This study                  |
