# Supplementary material for: Cas9 function and host genome sampling in Type II-A CRISPR–Cas adaptation
Source: PubMed Central journal article supplement — Genes Dev. 2015 Feb 15;29(4):356–61. doi: 10.1101/gad.257550.114 (PMC4335292; doi:10.1101/gad.257550.114), 2015-02-15
Supplement: supp_29.4.356_Supp_Table_S7.pdf [file supp_29.4.356_Supp_Table_S7.pdf]

**Supplemental Table S7. Oligos**

| Oligo Name      | Sequence                                                           | Purpose                                                          |
|-----------------|--------------------------------------------------------------------|------------------------------------------------------------------|
| Ppgm-f-XhoI     | CGCCTCGAGTGCGACAAGTAATAAACTAAAC                                    | forward primer to amplify <i>Ppgm</i> promoter                   |
| Ppgm-r-OL-Cas1  | CTCCAAGTCATGAAATATCTCCTTTTAAATTCAATGTTTCATCC                       | reverse primer to amplify <i>Ppgm</i> promoter                   |
| Cas1-f-OL-Ppgm  | GGAGATATTTTCATGACTTGGAGAGTTGTACATG                                 | forward primer to amplify <i>cas1/cas2/csn2</i>                  |
| Csn2-r-NotI     | CACGCGGCCGCTCAATCCTTACTTTCTAAAAATTTATGTAATAGTTCC                   | reverse primer to amplify <i>cas1/cas2/csn2</i>                  |
| CRISPR-leader-f | GCCCTCGAGTTGACAAGGACAGTTATTG                                       | forward primer to amplify CRISPR1 locus                          |
| 101-rev         | CAATTCTGAATCTTGATTTGCTGTC                                          | reverse primer to amplify CRISPR1 locus                          |
| pPgm-r-P        | Phos-GAAATATCTCCTTTTAAATTCAATG                                     | inverse PCR primer to delete <i>cas1</i> from pCas1/Cas2/Csn2    |
| Cas2start-f-P   | Phos-ATGAGGTATGAAGCATTGAG                                          | inverse PCR primer to delete <i>cas1</i> from pCas1/Cas2/Csn2    |
| Cas2end-r-P     | Phos-TCATATGACCACCAACTTATTATC                                      | inverse PCR primer to delete <i>csn2</i> from pCas1/Cas2/Csn2    |
| endofpWAR-f-P   | Phos-GCGGCCGCCACCGCGGTGGG                                          | inverse PCR primer to delete <i>csn2</i> from pCas1/Cas2/Csn2    |
| Cas1end-r-P     | Phos-CTTATTTTCTCCACTCTAAACTTG                                      | inverse PCR primer to delete <i>cas2</i> from pCas1/Cas2/Csn2    |
| Csn2start-f-P   | Phos-ATGAAATTTTTGTACAACATCCTTACAAAG                                | inverse PCR primer to delete <i>cas2</i> from pCas1/Cas2/Csn2    |
| Cas9-pro-f-xhoI | GAACTCGAG-GGTTTCGGAATGAAGTGAATAACG                                 | forward primer to amplify <i>cas9</i> (with its native promoter) |
| Cas9-r-XhoI     | GAACTCGAGTTAAAAATCTAGCTTAGGCTTATCAC                                | reverse primer to amplify <i>cas9</i>                            |
| Cas9-D9A-f      | GTGACTTAGTTTTAGGACTTGCTATCGGTATAGGTTCTGTTGG                        | quikchange primer to mutagenize RuvC active site of Cas9         |
| Cas9-D9A-r      | CCAACAGAACCTATACCGATAGCAAGTCCTAAAACCTAAGTCA                        | quikchange primer to mutagenize RuvC active site of Cas9         |
| Cas9-H599A-f    | GATAAATAATTCTAATCAGTTTGAAGTAGATGCTATTTTACCTCTTTCTATCACATTCGATGATAG | quikchange primer to mutagenize HNH active site of Cas9          |
| Cas9-H599A-r    | ATCATCGAATGTGATAGAAAGAGGTAATAGCATCTACTTCAAACCTGATTAGAATTATTTATC    | quikchange primer to mutagenize HNH active site of Cas9          |
